# Supplementary material for: Modelling the effect of the electrode potential on the metal–adsorbate surface states: relevant states in the charge transfer mechanism of SERS
Source: Royal Society of Chemistry journal article supplement (doi:10.1039/c0cc05313a), 2011-01-01
Supplement: c0cc05313a.pdf [file c0cc05313a.pdf]

**Modelling the Effect of the Electrode Potential on the  
Metal-Adsorbate Surfaces States: Relevant States in the  
Charge Transfer Mechanism of SERS**

Francisco Avila, David J. Fernández, Juan F. Arenas, Juan C. Otero\*  
and Juan Soto\*

Department of Physical Chemistry, Faculty of Sciences, University of Málaga, 29071 Málaga,  
Spain.

Corresponding authors: Dr. Juan Soto

Prof. Juan C. Otero

E-mail: soto@uma.es, jc\_otero@uma.es

Department of Physical Chemistry

Faculty of Science

University of Málaga

Campus de Teatinos, 29071 Málaga (Spain)

Fax: +34-95-2132019

Tlf: +34-95 -2132019

## Electronic Supporting Information

### Index

|                                                                                                                                                |     |
|------------------------------------------------------------------------------------------------------------------------------------------------|-----|
| 1. <b>Figure.S1</b> Active space for Ag <sub>2</sub> Py cluster.....                                                                           | S3  |
| 2. <b>Figure.S2.</b> Active space for Ag <sub>3</sub> Py <sup>q</sup> clusters.....                                                            | S4  |
| 3. <b>Table S1.</b> MS-CASPT2 excitation energies (eV) of [Ag <sub>2</sub> -Py] <sup>0</sup> cluster.....                                      | S5  |
| 4. <b>Table S2.</b> MS-CASPT2 excitation energies (eV) of [Ag <sub>3</sub> -Py] <sup>0</sup> cluster.....                                      | S6  |
| 5. <b>Table S3.</b> MS-CASPT2 excitation energies (eV) of [Ag <sub>3</sub> -Py] <sup>-</sup> cluster .....                                     | S7  |
| 6. <b>Table S4.</b> MS-CASPT2 excitation energies (eV) of [Ag <sub>3</sub> -Py] <sup>+</sup> cluster.....                                      | S8  |
| 7. <b>Table S5.</b> M06-HF excitation energies (A <sub>2</sub> and B <sub>1</sub> states) of [Ag <sub>2</sub> -Py] <sup>0</sup> cluster .....  | S9  |
| 8. <b>Table S6.</b> M06-HF excitation energies (A <sub>2</sub> and B <sub>1</sub> states) of [Ag <sub>3</sub> -Py] <sup>+</sup> cluster.....   | S10 |
| 9. <b>Table S7.</b> M06-HF excitation energies (A <sub>2</sub> and B <sub>1</sub> states) of [Ag <sub>3</sub> -Py] <sup>-</sup> cluster.....   | S11 |
| 10. <b>Table S8.</b> M06-HF excitation energies (A <sub>2</sub> and B <sub>1</sub> states) of [Ag <sub>n</sub> -Py] <sup>q</sup> clusters..... | S12 |

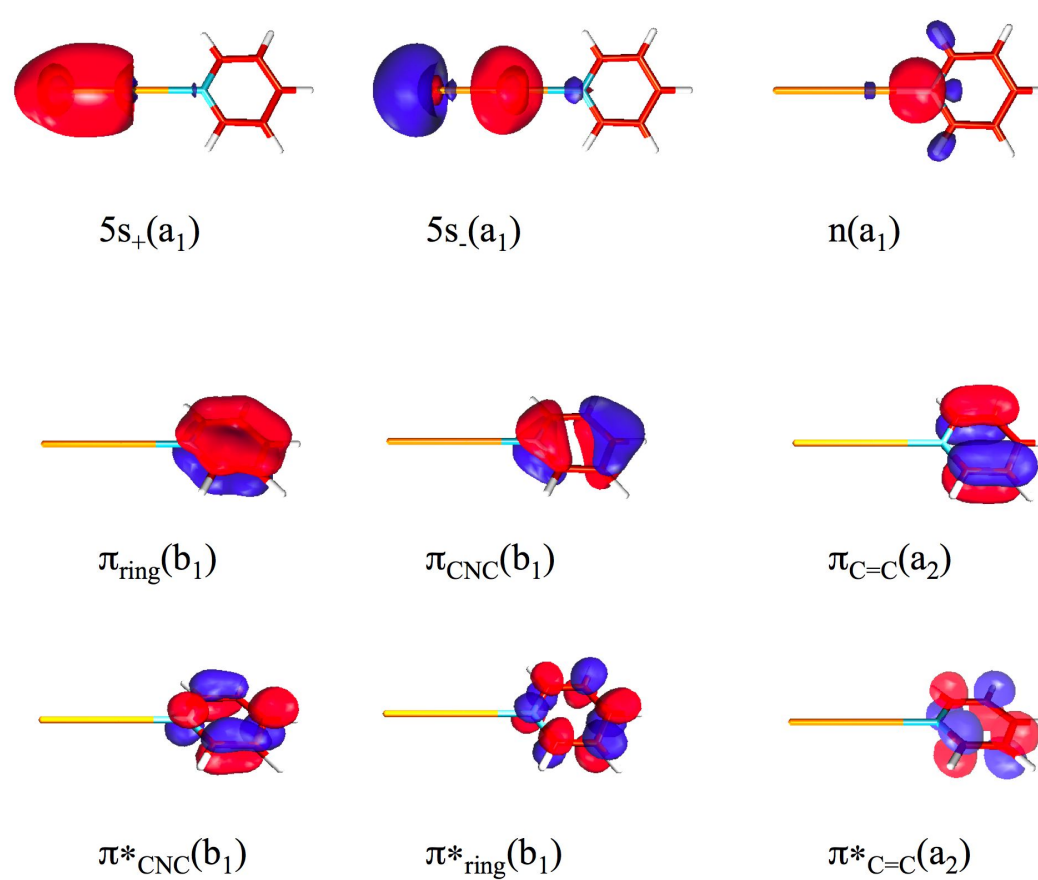

**Figure.S1.** Active space for  $\text{Ag}_2\text{Py}$  cluster.

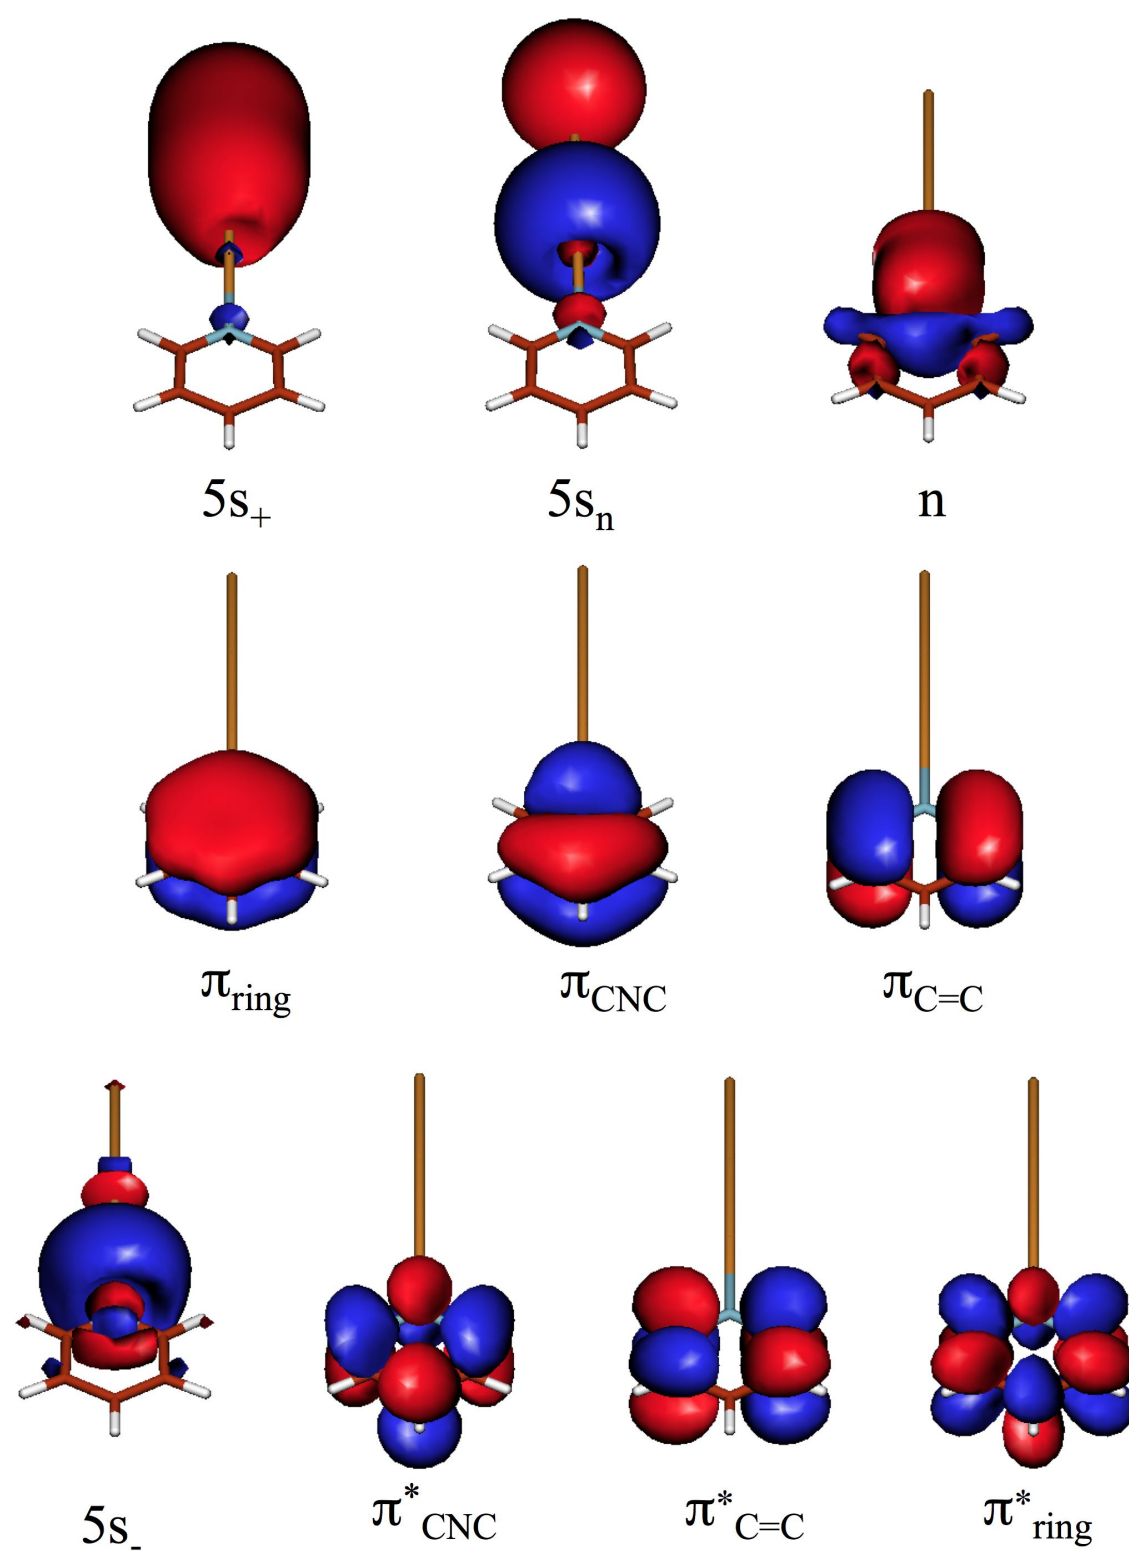

**Figure.S2.** Active space for  $\text{Ag}_3\text{Py}^q$  clusters

**Table S1.** MS-CASPT2 excitation energies (eV) of [Ag<sub>2</sub>-Py]<sup>0</sup> cluster.<sup>a</sup>

| State                                 | Configuration <sup>b</sup>                                                | w <sup>c</sup> | $Q^d$ | $f^e$                 | $\Delta E^f$ | $\Delta E^h$ |
|---------------------------------------|---------------------------------------------------------------------------|----------------|-------|-----------------------|--------------|--------------|
| 1A <sub>1</sub>                       | <i>Ref. Conf</i>                                                          | 72             | +0.1  | -                     | -            |              |
|                                       | (5s+) <sup>1</sup> (5s-) <sup>1</sup>                                     | 16             |       |                       |              |              |
| 2A <sub>1</sub>                       | (5s+) <sup>1</sup> (5s-) <sup>1</sup>                                     | 68             | +0.1  | 0.659                 | 3.01         |              |
|                                       | <i>Ref. Conf</i>                                                          | 15             |       |                       |              |              |
| 1B <sub>1</sub> <b>CT0</b>            | (5s+) <sup>1</sup> ( $\pi^*_{\text{CNC}}$ ) <sup>1</sup>                  | 88             | -0.7  | 9.0 10 <sup>-05</sup> | <b>3.54</b>  | <b>3.30</b>  |
| 1A <sub>2</sub> <b>CT1</b>            | (5s+) <sup>1</sup> ( $\pi^*_{\text{C=C}}$ ) <sup>1</sup>                  | 70             | -0.7  | 0                     | <b>4.05</b>  | <b>3.95</b>  |
|                                       | (5s+) <sup>1</sup> ( $\pi^*_{\text{C=C}}$ ) <sup>1</sup>                  | 15             |       |                       |              |              |
| 1B <sub>2</sub>                       | ( $\pi_{\text{C=C}}$ ) <sup>1</sup> ( $\pi^*_{\text{CNC}}$ ) <sup>1</sup> | 49             | +0.1  | 2.0 10 <sup>-02</sup> | 5.22         |              |
|                                       | ( $\pi_{\text{CNC}}$ ) <sup>1</sup> ( $\pi^*_{\text{C=C}}$ ) <sup>1</sup> | 22             |       |                       |              |              |
| 2B <sub>1</sub> <b>S1<sup>g</sup></b> | (n) <sup>1</sup> ( $\pi^*_{\text{CNC}}$ ) <sup>1</sup>                    | 83             | +0.0  | 1.0 10 <sup>-02</sup> | <b>5.54</b>  |              |

<sup>a</sup>Reference active space 10 electrons in 9 orbitals. Geometry optimized at the CAS-SCF level.<sup>b</sup>Reference configuration: $(n)^2(5s+)^2(\pi_{\text{ring}};1b_1)^2(\pi_{\text{CNC}};2b_1)^2(\pi_{\text{C=C}};1a_2)^2(5s-)^0(\pi^*_{\text{CNC}};3b_1)^0(\pi^*_{\text{C=C}};2a_2)^0(\pi^*_{\text{ring}};4b_1)^0$ <sup>c</sup>Weight of the perturbatively modified wave function.<sup>d</sup>Mülliken charge on the adsorbate.<sup>e</sup>Oscillator strength.<sup>f</sup>Excitation energy in eV.<sup>h</sup>M06-HF excitation energy in eV.<sup>g</sup>First excited state of the neutral pyridine.

**Table S2.** MS-CASPT2 excitation energies of [Ag<sub>3</sub>-Py]<sup>0</sup> cluster.<sup>a</sup>

| State                                                | Configuration <sup>b</sup>                                                                                                     | w <sup>c</sup> | Q <sup>d</sup> | f <sup>e</sup>        | ΔE <sup>f</sup> |
|------------------------------------------------------|--------------------------------------------------------------------------------------------------------------------------------|----------------|----------------|-----------------------|-----------------|
| 1 <sup>2</sup> A <sub>1</sub>                        | <i>Ref. Conf.</i>                                                                                                              | 86             | +0.1           |                       |                 |
| 2 <sup>2</sup> A <sub>1</sub>                        | (5s <sub>+</sub> ) <sup>1</sup> (5s <sub>n</sub> ) <sup>2</sup>                                                                | 81             | +0.2           | 0.12                  | 1.34            |
| 1B <sub>1</sub> <b>CT0</b>                           | (5s <sub>n</sub> ) <sup>0</sup> (π <sup>*</sup> <sub>CNC</sub> ) <sup>1</sup>                                                  | 81             | -0.6           | 3.43 10 <sup>-5</sup> | <b>2.52</b>     |
| 3 <sup>2</sup> A <sub>1</sub>                        | (5s <sub>n</sub> ) <sup>0</sup> (5s <sub>-</sub> ) <sup>1</sup>                                                                | 73             | +0.2           | 0.84                  | 2.84            |
| 1 <sup>2</sup> A <sub>2</sub> <b>CT1</b>             | (5s <sub>n</sub> ) <sup>0</sup> (π <sup>*</sup> <sub>C=C</sub> ) <sup>1</sup>                                                  | 80             | -0.7           | 0                     | <b>3.25</b>     |
| 2B <sub>1</sub> <b>CT0'</b>                          | (5s <sub>+</sub> ) <sup>1</sup> (π <sup>*</sup> <sub>CNC</sub> ) <sup>1</sup>                                                  | 77             | -0.6           | 1.99 10 <sup>-4</sup> | 3.57            |
|                                                      | (n) <sup>1</sup> (π <sup>*</sup> <sub>CNC</sub> ) <sup>1</sup>                                                                 | 11             |                |                       |                 |
| 2 <sup>2</sup> A <sub>2</sub> <b>CT1'</b>            | (5s <sub>+</sub> ) <sup>1</sup> (π <sup>*</sup> <sub>C=C</sub> ) <sup>1</sup>                                                  | 87             | -0.8           | 0                     | 4.21            |
| 4 <sup>2</sup> A <sub>1</sub>                        | (π <sub>C=C</sub> ) <sup>1</sup> (π <sup>*</sup> <sub>C=C</sub> ) <sup>1</sup>                                                 | 58             | +0.1           | 7.89 10 <sup>-6</sup> | 4.24            |
|                                                      | (π <sub>CNC</sub> ) <sup>1</sup> (π <sup>*</sup> <sub>CNC</sub> ) <sup>1</sup>                                                 | 22             |                |                       |                 |
| 1 <sup>2</sup> B <sub>2</sub>                        | (π <sub>C=C</sub> ) <sup>1</sup> (π <sup>*</sup> <sub>CNC</sub> ) <sup>1</sup>                                                 | 78             | +0.1           | 2.88 10 <sup>-6</sup> | 4.36            |
| 5 <sup>2</sup> A <sub>1</sub>                        | (5s <sub>+</sub> ) <sup>1</sup> (5s <sub>-</sub> ) <sup>1</sup>                                                                | 79             | +0.2           | 4.86 10 <sup>-4</sup> | 4.37            |
| 3B <sub>1</sub> <b>CT0''</b>                         | (5s <sub>+</sub> ) <sup>1</sup> (π <sup>*</sup> <sub>CNC</sub> ) <sup>1</sup>                                                  | 76             | -0.3           | 1.59 10 <sup>-5</sup> | 4.47            |
| 6 <sup>2</sup> A <sub>1</sub>                        | (π <sub>CNC</sub> ) <sup>1</sup> (π <sup>*</sup> <sub>CNC</sub> ) <sup>1</sup>                                                 | 57             | +0.1           | 2.68 10 <sup>-6</sup> | 4.72            |
|                                                      | (π <sub>C=C</sub> ) <sup>1</sup> (π <sup>*</sup> <sub>C=C</sub> ) <sup>1</sup>                                                 | 20             |                |                       |                 |
| 4 <sup>2</sup> B <sub>1</sub> <b>S1</b> <sup>g</sup> | (n) <sup>1</sup> (π <sup>*</sup> <sub>CNC</sub> ) <sup>1</sup>                                                                 | 63             | -0.2           | 1.19 10 <sup>-3</sup> | <b>4.86</b>     |
|                                                      | (n) <sup>1</sup> (5s <sub>+</sub> ) <sup>1</sup> (5s <sub>n</sub> ) <sup>2</sup> (π <sup>*</sup> <sub>CNC</sub> ) <sup>1</sup> | 14             |                |                       |                 |

<sup>a</sup>Reference active space 11 electrons in 10 orbitals. Geometry optimized at the CAS-SCF level.<sup>b</sup>Reference configuration:(n;a<sub>1</sub>)<sup>2</sup>(5s<sub>+</sub>;a<sub>1</sub>)<sup>2</sup>(5s<sub>n</sub>;a<sub>1</sub>)<sup>1</sup>(π<sub>ring</sub>;1b<sub>1</sub>)<sup>2</sup>(π<sub>CNC</sub>;2b<sub>1</sub>)<sup>2</sup>(π<sub>C=C</sub>;1a<sub>2</sub>)<sup>2</sup>(5s<sub>-</sub>)<sup>0</sup>(π<sup>\*</sup><sub>CNC</sub>;3b<sub>1</sub>)<sup>0</sup>(π<sup>\*</sup><sub>C=C</sub>;2a<sub>2</sub>)<sup>0</sup>(π<sup>\*</sup><sub>ring</sub>;4b<sub>1</sub>)<sup>0</sup>.<sup>c</sup>Weight of the perturbatively modified wave function.<sup>d</sup>Mülliken charge on the adsorbate.<sup>e</sup>Oscillator strength.<sup>f</sup>Excitation energy in eV.<sup>g</sup>First excited state of isolated neutral pyridine.

**Table S3.** MS-CASPT2 excitation energies (eV) of [Ag<sub>3</sub>-Py]<sup>−</sup> cluster.<sup>a</sup>

| State                                               | Configuration <sup>b</sup>                                                                                                                      | w <sup>c</sup> | $Q^d$ | $f^e$                 | $\Delta E^f$ | $\Delta E^h$ |
|-----------------------------------------------------|-------------------------------------------------------------------------------------------------------------------------------------------------|----------------|-------|-----------------------|--------------|--------------|
| 1A <sub>1</sub>                                     | Ref. Conf.                                                                                                                                      | 89             | +0.1  |                       |              |              |
| 1B <sub>1</sub> <b>CT0</b>                          | (5s <sub>n</sub> ) <sup>1</sup> ( $\pi^*_{\text{CNC}}$ ) <sup>1</sup>                                                                           | 90             | -0.7  | 5.64·10 <sup>-8</sup> | <b>0.96</b>  | <b>1.47</b>  |
| 1 <sup>1</sup> A <sub>2</sub> <b>CT1</b>            | (5s <sub>n</sub> ) <sup>1</sup> ( $\pi^*_{\text{C=C}}$ ) <sup>1</sup>                                                                           | 90             | -0.8  | 0                     | <b>1.51</b>  | <b>1.88</b>  |
| 2 <sup>1</sup> B <sub>1</sub> <b>CT0'</b>           | (5s <sub>+</sub> ) <sup>1</sup> ( $\pi^*_{\text{CNC}}$ ) <sup>1</sup>                                                                           | 90             | -0.7  | 3.21·10 <sup>-5</sup> | 2.66         |              |
| 2 <sup>1</sup> A <sub>2</sub> <b>CT1'</b>           | (5s <sub>+</sub> ) <sup>1</sup> ( $\pi^*_{\text{C=C}}$ ) <sup>1</sup>                                                                           | 85             | -0.76 | 0                     | 3.22         |              |
| 3 <sup>1</sup> B <sub>1</sub> <b>CT0'</b>           | (5s <sub>n</sub> ) <sup>1</sup> ( $\pi^*_{\text{ring}}$ ) <sup>1</sup>                                                                          | 22             | -0.7  | 2.09·10 <sup>-3</sup> | 4.65         |              |
|                                                     | (5s <sub>n</sub> ) <sup>1</sup> ( $\pi_{\text{C=C}}$ ) <sup>1</sup> ( $\pi^*_{\text{CNC}}$ ) <sup>1</sup> ( $\pi^*_{\text{C=C}}$ ) <sup>1</sup> | 13             |       |                       |              |              |
|                                                     | (5s <sub>n</sub> ) <sup>1</sup> ( $\pi_{\text{CNC}}$ ) <sup>1</sup> ( $\pi^*_{\text{CNC}}$ ) <sup>2</sup>                                       | -              |       |                       |              |              |
|                                                     | (n) <sup>1</sup> ( $\pi^*_{\text{CNC}}$ ) <sup>1</sup>                                                                                          | 40             |       |                       |              |              |
| 4 <sup>1</sup> B <sub>1</sub> <b>S1<sup>g</sup></b> | (n) <sup>1</sup> ( $\pi^*_{\text{CNC}}$ ) <sup>1</sup>                                                                                          | 40             | 0     | 9.94·10 <sup>-3</sup> | <b>4.81</b>  |              |
|                                                     | (5s <sub>n</sub> ) <sup>1</sup> ( $\pi^*_{\text{ring}}$ ) <sup>1</sup>                                                                          | 26             |       |                       |              |              |
|                                                     | (5s <sub>n</sub> ) <sup>1</sup> ( $\pi_{\text{C=C}}$ ) <sup>1</sup> ( $\pi^*_{\text{CNC}}$ ) <sup>1</sup> ( $\pi^*_{\text{C=C}}$ ) <sup>1</sup> | 15             |       |                       |              |              |

<sup>a</sup>Reference active space 12 electrons in 10 orbitals. Geometry optimized at the CAS-SCF level.<sup>b</sup>Reference configuration:(n;a<sub>1</sub>)<sup>2</sup>(5s<sub>+</sub>;a<sub>1</sub>)<sup>2</sup>(5s<sub>n</sub>;a<sub>1</sub>)<sup>2</sup>( $\pi_{\text{ring}}$ ;1b<sub>1</sub>)<sup>2</sup>( $\pi_{\text{CNC}}$ ;2b<sub>1</sub>)<sup>2</sup>( $\pi_{\text{C=C}}$ ;1a<sub>2</sub>)<sup>2</sup>(5s.)<sup>0</sup>( $\pi^*_{\text{CNC}}$ ;3b<sub>1</sub>)<sup>0</sup>( $\pi^*_{\text{C=C}}$ ;2a<sub>2</sub>)<sup>0</sup>( $\pi^*_{\text{ring}}$ ;4b<sub>1</sub>)<sup>0</sup>.<sup>c</sup>Weight of the perturbatively modified wave function.<sup>d</sup>Mülliken charge on the adsorbate.<sup>e</sup>Oscillator strength.<sup>f</sup>Excitation energy in eV.<sup>g</sup>First excited state of isolated neutral pyridine.<sup>h</sup>M06-HF excitation energy in eV.

**Table S4.** MS-CASPT2 excitation energies (eV) of [Ag<sub>3</sub>-Py]<sup>+</sup> cluster.<sup>a</sup>

| State                                    | Configuration <sup>b</sup>                                                                                                  | w <sup>c</sup> | $Q^d$ | $f^e$                 | $\Delta E^f$ | $\Delta E^h$ |
|------------------------------------------|-----------------------------------------------------------------------------------------------------------------------------|----------------|-------|-----------------------|--------------|--------------|
| 1 <sup>1</sup> A <sub>1</sub>            | Ref. Conf.                                                                                                                  | 81             | +0.2  |                       |              |              |
| 2 <sup>1</sup> A <sub>1</sub>            | (5s <sub>+</sub> ) <sup>1</sup> (5s <sub>n</sub> ) <sup>1</sup>                                                             | 81             | +0.2  | 0.66                  | 2.40         |              |
| 2 <sup>1</sup> A <sub>1</sub>            | (5s <sub>+</sub> ) <sup>1</sup> (5s <sub>n</sub> ) <sup>1</sup>                                                             | 81             | +0.2  | 2.76 10 <sup>-5</sup> | 2.40         |              |
| 3 <sup>1</sup> A <sub>1</sub>            | (5s <sub>+</sub> ) <sup>0</sup> (5s <sub>n</sub> ) <sup>2</sup>                                                             | 63             | +0.2  | 6.26 10 <sup>-4</sup> | 3.62         |              |
|                                          | (5s <sub>+</sub> ) <sup>1</sup> (5s <sub>-</sub> ) <sup>1</sup>                                                             | 17             |       |                       |              |              |
| 4 <sup>1</sup> A <sub>1</sub>            | (5s <sub>+</sub> ) <sup>1</sup> ( $\pi_{C=C}$ ) <sup>1</sup> (5s <sub>n</sub> ) <sup>1</sup> ( $\pi_{C=C}^*$ ) <sup>1</sup> | 34             | +0.2  | 2.49 10 <sup>-3</sup> | 5.11         |              |
|                                          | (5s <sub>+</sub> ) <sup>1</sup> ( $\pi_{CNC}$ ) <sup>1</sup> (5s <sub>n</sub> ) <sup>1</sup> ( $\pi_{CNC}^*$ ) <sup>1</sup> | 35             |       |                       |              |              |
|                                          | (5s <sub>+</sub> ) <sup>1</sup> (5s <sub>-</sub> ) <sup>1</sup>                                                             | 14             |       |                       |              |              |
| 5 <sup>1</sup> A <sub>1</sub>            | (5s <sub>+</sub> ) <sup>1</sup> (5s <sub>-</sub> ) <sup>1</sup>                                                             | 49             | +0.2  | 1.92 10 <sup>-4</sup> | 5.03         |              |
|                                          | (5s <sub>+</sub> ) <sup>0</sup> (5s <sub>n</sub> ) <sup>2</sup>                                                             | 10             |       |                       |              |              |
|                                          | (5s <sub>+</sub> ) <sup>1</sup> ( $\pi_{C=C}$ ) <sup>1</sup> (5s <sub>n</sub> ) <sup>1</sup> ( $\pi_{C=C}^*$ ) <sup>1</sup> | 25             |       |                       |              |              |
| 6 <sup>1</sup> A <sub>1</sub>            | (5s <sub>+</sub> ) <sup>1</sup> ( $\pi_{CNC}$ ) <sup>1</sup> (5s <sub>n</sub> ) <sup>1</sup> ( $\pi_{CNC}^*$ ) <sup>1</sup> | 50             | +0.2  | 1.92 10 <sup>-4</sup> | 5.64         |              |
|                                          | (5s <sub>+</sub> ) <sup>1</sup> ( $\pi_{C=C}$ ) <sup>1</sup> (5s <sub>n</sub> ) <sup>1</sup> ( $\pi_{C=C}^*$ ) <sup>1</sup> | 25             |       |                       |              |              |
| 1 <sup>1</sup> B <sub>2</sub>            | ( $\pi_{C=C}$ ) <sup>1</sup> ( $\pi_{CNC}^*$ ) <sup>1</sup>                                                                 | 47             | +0.2  | 3.35 10 <sup>-2</sup> | 4.90         |              |
|                                          | ( $\pi_{CNC}$ ) <sup>1</sup> ( $\pi_{C=C}^*$ ) <sup>1</sup>                                                                 | 19             |       |                       |              |              |
| 2 <sup>1</sup> B <sub>2</sub>            | (5s <sub>+</sub> ) <sup>1</sup> ( $\pi_{C=C}$ ) <sup>1</sup> (5s <sub>n</sub> ) <sup>1</sup> ( $\pi_{CNC}^*$ ) <sup>1</sup> | 90             | +0.2  | 3.08 10 <sup>-4</sup> | 4.98         |              |
| 1 <sup>1</sup> A <sub>2</sub> <b>CTi</b> | ( $\pi_{C=C}$ ) <sup>1</sup> (5s <sub>n</sub> ) <sup>1</sup>                                                                | 82             | +1.0  | 0                     | 5.23         |              |
| 1 <sup>1</sup> B <sub>1</sub> <b>CTi</b> | ( $\pi_{CNC}$ ) <sup>1</sup> (5s <sub>n</sub> ) <sup>1</sup>                                                                | 82             | +1.1  | 1.51 10 <sup>-3</sup> | 5.39         |              |
| 2 <sup>1</sup> B <sub>1</sub> <b>CT0</b> | (5s <sub>+</sub> ) <sup>1</sup> ( $\pi_{CNC}^*$ ) <sup>1</sup>                                                              | 32             | 0.0   | 2.07 10 <sup>-3</sup> | <b>5.42</b>  | <b>5.46</b>  |
|                                          | (n) <sup>1</sup> (5s <sub>+</sub> ) <sup>1</sup> (5s <sub>n</sub> ) <sup>1</sup> ( $\pi_{CNC}^*$ ) <sup>1</sup>             | 16             |       |                       |              |              |
|                                          | (5s <sub>+</sub> ) <sup>0</sup> (5s <sub>n</sub> ) <sup>1</sup> ( $\pi_{CNC}^*$ ) <sup>1</sup>                              | 16             |       |                       |              |              |
|                                          | (n) <sup>1</sup> ( $\pi_{CNC}^*$ ) <sup>1</sup>                                                                             | 12             |       |                       |              |              |
| 3 <sup>1</sup> B <sub>1</sub> <b>S1</b>  | (n) <sup>1</sup> ( $\pi_{CNC}^*$ ) <sup>1</sup>                                                                             | 48             | +0.1  | 5.89 10 <sup>-3</sup> | <b>5.87</b>  |              |
|                                          | (n) <sup>1</sup> (5s <sub>+</sub> ) <sup>1</sup> (5s <sub>n</sub> ) <sup>1</sup> ( $\pi_{CNC}^*$ ) <sup>1</sup>             | 24             |       |                       |              |              |

<sup>a</sup>Reference active space 10 electrons in 10 orbitals. Geometry optimized at the CAS-SCF level.<sup>b</sup>Reference configuration:(n;a<sub>1</sub>)<sup>2</sup>(5s<sub>+</sub>;a<sub>1</sub>)<sup>2</sup>(5s<sub>n</sub>;a<sub>1</sub>)<sup>0</sup>( $\pi_{ring}$ ;1b<sub>1</sub>)<sup>2</sup>( $\pi_{CNC}$ ;2b<sub>1</sub>)<sup>2</sup>( $\pi_{C=C}$ ;1a<sub>2</sub>)<sup>2</sup>(5s<sub>-</sub>)<sup>0</sup>( $\pi_{CNC}^*$ ;3b<sub>1</sub>)<sup>0</sup>( $\pi_{C=C}^*$ ;2a<sub>2</sub>)<sup>0</sup>( $\pi_{ring}^*$ ;4b<sub>1</sub>)<sup>0</sup>.<sup>c</sup>Weight of the perturbatively modified wave function.<sup>d</sup>Mülliken charge on the adsorbate.<sup>e</sup>Oscillator strength.<sup>f</sup>Excitation energy in eV.<sup>g</sup>First excited state of isolated neutral pyridine.<sup>h</sup>M06-HF excitation energy in eV.



**Table S5.** M06-HF excitation energies (A<sub>2</sub> and B<sub>1</sub> states) of [Ag<sub>2</sub>-Py]<sup>0</sup> cluster.

| State           | Sym                           | Configuration <sup>a</sup>                                                           | w <sup>b</sup> | Q <sup>c</sup> | ΔE <sup>d</sup> | f <sup>e</sup> |
|-----------------|-------------------------------|--------------------------------------------------------------------------------------|----------------|----------------|-----------------|----------------|
| S <sub>0</sub>  | 1 <sup>1</sup> A <sub>1</sub> | Ref. Conf.                                                                           |                | 0.12           |                 |                |
| S <sub>3</sub>  | 1 <sup>1</sup> B <sub>1</sub> | (5s <sub>+</sub> ) <sup>1</sup> (π <sup>*</sup> <sub>CNC</sub> ) <sup>1</sup>        | 0.40           | -0.34          | 3.30            | 0.1073         |
|                 | (CT <sub>0</sub> )            | (5s <sub>+</sub> ) <sup>1</sup> (5p <sub>+</sub> ) <sup>1</sup>                      | 0.07           |                |                 |                |
| S <sub>4</sub>  | 2 <sup>1</sup> B <sub>1</sub> | (5s <sub>+</sub> ) <sup>1</sup> (5p <sub>+</sub> ) <sup>1</sup>                      | 0.42           | -0.17          | 3.48            | 0.1668         |
|                 |                               | (5s <sub>+</sub> ) <sup>1</sup> (π <sup>*</sup> <sub>CNC</sub> ) <sup>1</sup>        | 0.07           |                |                 |                |
| S <sub>5</sub>  | 1 <sup>1</sup> A <sub>2</sub> | (5s <sub>+</sub> ) <sup>1</sup> (π <sup>*</sup> <sub>C=C</sub> ) <sup>1</sup>        | 0,5            | -0.72          | 3.95            | 0.0000         |
|                 | (CT <sub>1</sub> )            |                                                                                      |                |                |                 |                |
| S <sub>7</sub>  | 3 <sup>1</sup> B <sub>1</sub> | (5s <sub>+</sub> ) <sup>1</sup> (5p <sub>-</sub> ) <sup>1</sup>                      | 0,49           |                | 4.26            | 0.0624         |
| S <sub>10</sub> | 4 <sup>1</sup> B <sub>1</sub> | (n + d <sub>Z(-)</sub> ) <sup>1</sup> (π <sup>*</sup> <sub>CNC</sub> ) <sup>1</sup>  | 0.27           | -0.04          | 5.14            | 0.0037         |
|                 |                               | (n - d <sub>Z(-)</sub> ) <sup>1</sup> (π <sup>*</sup> <sub>CNC</sub> ) <sup>1</sup>  | 0.08           |                |                 |                |
|                 |                               | (n + d <sub>Z(+)</sub> ) <sup>1</sup> (π <sup>*</sup> <sub>CNC</sub> ) <sup>1</sup>  | 0.04           |                |                 |                |
|                 |                               | (n + d <sub>Z(-)</sub> ) <sup>1</sup> (5p <sub>+</sub> ) <sup>1</sup>                | 0.02           |                |                 |                |
|                 |                               | (5s <sub>+</sub> ) <sup>1</sup> (π <sup>*</sup> <sub>CNC</sub> ) <sup>1</sup>        | 0.02           |                |                 |                |
|                 |                               | (n + d <sub>Z(-)</sub> ) <sup>1</sup> (π <sup>*</sup> <sub>ring</sub> ) <sup>1</sup> | 0.02           |                |                 |                |
| S <sub>13</sub> | 5 <sup>1</sup> B <sub>1</sub> | (5s <sub>+</sub> ) <sup>1</sup> (6p <sub>+</sub> ) <sup>1</sup>                      | 0.43           |                | 6.35            | 0.0123         |
|                 |                               | (5s <sub>+</sub> ) <sup>1</sup> (5p <sub>+</sub> ) <sup>1</sup>                      | 0.01           |                |                 |                |

<sup>a</sup>Reference configuration:  
(n;a<sub>1</sub>)<sup>2</sup>(5s<sub>+</sub>;a<sub>1</sub>)<sup>2</sup>(5s<sub>-</sub>;a<sub>1</sub>)<sup>2</sup>(π<sub>ping</sub>;1b<sub>1</sub>)<sup>2</sup>(π<sub>CNC</sub>;2b<sub>1</sub>)<sup>2</sup>(π<sub>C=C</sub>;1a<sub>2</sub>)<sup>2</sup>(5s<sub>-</sub>)<sup>0</sup>(π<sup>\*</sup><sub>CNC</sub>;3b<sub>1</sub>)<sup>0</sup>(π<sup>\*</sup><sub>C=C</sub>;2a<sub>2</sub>)<sup>0</sup>(π<sup>\*</sup><sub>ring</sub>;4b<sub>1</sub>)<sup>0</sup>.

<sup>b</sup>Weight of the configuration

<sup>c</sup>Mülliken charge on the adsorbate.

<sup>d</sup>Excitation energy in eV.

<sup>e</sup>Oscillator strength.

**Table S6.** M06-HF excitation energies (A<sub>2</sub> and B<sub>1</sub> states) of [Ag<sub>3</sub>-Py]<sup>+</sup> cluster.

| State           | Sym                                                  | Configuration <sup>a</sup>                                                                          | w <sup>b</sup> | Q <sup>c</sup> | ΔE <sup>d</sup> | f <sup>e</sup> |
|-----------------|------------------------------------------------------|-----------------------------------------------------------------------------------------------------|----------------|----------------|-----------------|----------------|
| S <sub>0</sub>  | 1 <sup>1</sup> A <sub>1</sub>                        | Ref. Conf.                                                                                          |                | 0.21           |                 |                |
| S <sub>4</sub>  | 1 <sup>1</sup> B <sub>1</sub>                        | (5s <sub>+</sub> ) <sup>1</sup> (5p <sub>x(+) </sub> ) <sup>1</sup>                                 | 0.48           | 0.21           | 4.31            | 0.3613         |
| S <sub>6</sub>  | 2 <sup>1</sup> B <sub>1</sub>                        | (5s <sub>+</sub> ) <sup>1</sup> (5p <sub>x(n) </sub> + π <sup>*</sup> <sub>CNC</sub> ) <sup>1</sup> | 0.29           | 0.20           | 4.98            | 0.0248         |
|                 |                                                      | (5s <sub>+</sub> ) <sup>1</sup> (π <sup>*</sup> <sub>CNC</sub> + 5p <sub>x(n) </sub> ) <sup>1</sup> | 0.19           |                |                 |                |
|                 |                                                      | (5s <sub>+</sub> ) <sup>1</sup> (6p <sub>x</sub> ) <sup>1</sup>                                     | 0.01           |                |                 |                |
| S <sub>8</sub>  | 3 <sup>1</sup> B <sub>1</sub><br>(CT <sub>0</sub> )  | (n) <sup>1</sup> (π <sup>*</sup> <sub>CNC</sub> + 5p <sub>x(n) </sub> ) <sup>1</sup>                | 0.18           | -0.04          | 5.46            | 0.0069         |
|                 |                                                      | (5s <sub>+</sub> ) <sup>1</sup> (5p <sub>x(n) </sub> + π <sup>*</sup> <sub>CNC</sub> ) <sup>1</sup> | 0.10           |                |                 |                |
|                 |                                                      | (5s <sub>+</sub> ) <sup>1</sup> (π <sup>*</sup> <sub>CNC</sub> + 5p <sub>x(n) </sub> ) <sup>1</sup> | 0.09           |                |                 |                |
|                 |                                                      | (n) <sup>1</sup> (π <sup>*</sup> <sub>CNC</sub> + 5p <sub>x(n) </sub> ) <sup>1</sup>                | 0.05           |                |                 |                |
|                 |                                                      | (n) <sup>1</sup> (π <sup>*</sup> <sub>ring</sub> ) <sup>1</sup>                                     | 0.02           |                |                 |                |
| S <sub>11</sub> | 4 <sup>1</sup> B <sub>1</sub><br>(CT <sub>0</sub> )' | (5s <sub>+</sub> ) <sup>1</sup> (π <sup>*</sup> <sub>CNC</sub> + 5p <sub>x(n) </sub> ) <sup>1</sup> | 0.15           | -0.1           | 5.93            | 0.0037         |
|                 |                                                      | (d <sub>xz(-) </sub> ) <sup>1</sup> (5s <sub>n</sub> ) <sup>1</sup>                                 | 0.12           |                |                 |                |
|                 |                                                      | (5s <sub>+</sub> ) <sup>1</sup> (5p <sub>x(n) </sub> + π <sup>*</sup> <sub>CNC</sub> ) <sup>1</sup> | 0.07           |                |                 |                |
|                 |                                                      | (n) <sup>1</sup> (π <sup>*</sup> <sub>CNC</sub> + 5p <sub>x(n) </sub> ) <sup>1</sup>                | 0.06           |                |                 |                |
|                 |                                                      | (π <sub>CNC</sub> ) <sup>1</sup> (5s <sub>n</sub> ) <sup>1</sup>                                    | 0.03           |                |                 |                |
|                 |                                                      | (n) <sup>1</sup> (5p <sub>x(n) </sub> + π <sup>*</sup> <sub>CNC</sub> ) <sup>1</sup>                | 0.02           |                |                 |                |
| S <sub>12</sub> | 5 <sup>1</sup> B <sub>1</sub>                        | (d <sub>xz(-) </sub> ) <sup>1</sup> (5s <sub>n</sub> ) <sup>1</sup>                                 | 0.23           | 0.03           | 5.98            | 0.0138         |
|                 |                                                      | (n) <sup>1</sup> (π <sup>*</sup> <sub>CNC</sub> + 5p <sub>x(n) </sub> ) <sup>1</sup>                | 0.07           |                |                 |                |
|                 |                                                      | (5s <sub>+</sub> ) <sup>1</sup> (π <sup>*</sup> <sub>CNC</sub> + 5p <sub>x(n) </sub> ) <sup>1</sup> | 0.05           |                |                 |                |
|                 |                                                      | (5s <sub>+</sub> ) <sup>1</sup> (5p <sub>x(n) </sub> + π <sup>*</sup> <sub>CNC</sub> ) <sup>1</sup> | 0.03           |                |                 |                |
|                 |                                                      | (5s <sub>+</sub> ) <sup>1</sup> (5p <sub>x(-) </sub> ) <sup>1</sup>                                 | 0.02           |                |                 |                |
|                 |                                                      | (n) <sup>1</sup> (5p <sub>x(n) </sub> + π <sup>*</sup> <sub>CNC</sub> ) <sup>1</sup>                | 0.02           |                |                 |                |
| S <sub>14</sub> | 1 <sup>1</sup> A <sub>2</sub>                        | (π <sub>C=C</sub> ) <sup>1</sup> (5s <sub>n</sub> ) <sup>1</sup>                                    | 0.44           |                | 6.07            | 0.0000         |
|                 |                                                      | (π <sub>C=C</sub> ) <sup>1</sup> (5s <sub>.</sub> ) <sup>1</sup>                                    | 0.04           |                |                 |                |
| S <sub>15</sub> | 2 <sup>1</sup> A <sub>2</sub>                        | (4d <sub>xy</sub> ) <sup>1</sup> (5s <sub>n</sub> ) <sup>1</sup>                                    | 0.43           |                | 6.14            | 0.0000         |
|                 |                                                      | (4d <sub>xy</sub> ) <sup>1</sup> (5p <sub>z(-) </sub> ) <sup>1</sup>                                | 0.03           |                |                 |                |
|                 |                                                      | (4d <sub>xy</sub> ) <sup>1</sup> (5p <sub>z(+) </sub> ) <sup>1</sup>                                | 0.02           |                |                 |                |
|                 |                                                      | (4d <sub>xy</sub> ) <sup>1</sup> (5s <sub>.</sub> ) <sup>1</sup>                                    | 0.02           |                |                 |                |
| S <sub>20</sub> | 3 <sup>1</sup> A <sub>2</sub><br>(CT <sub>1</sub> )  | (5s <sub>+</sub> ) <sup>1</sup> (π <sup>*</sup> <sub>C=C</sub> ) <sup>1</sup>                       | 0.47           | -0.55          | 6.38            | 0.0000         |
|                 |                                                      | (n) <sup>1</sup> (π <sup>*</sup> <sub>C=C</sub> ) <sup>1</sup>                                      | 0.03           |                |                 |                |

<sup>a</sup>Reference configuration:  
(n;a<sub>1</sub>)<sup>2</sup>(5s<sub>+</sub>;a<sub>1</sub>)<sup>2</sup>(5s<sub>n</sub>;a<sub>1</sub>)<sup>0</sup>(π<sub>ping</sub>;1b<sub>1</sub>)<sup>2</sup>(π<sub>CNC</sub>;2b<sub>1</sub>)<sup>2</sup>(π<sub>C=C</sub>;1a<sub>2</sub>)<sup>2</sup>(5s<sub>.</sub>)<sup>0</sup>(π<sup>\*</sup><sub>CNC</sub>;3b<sub>1</sub>)<sup>0</sup>(π<sup>\*</sup><sub>C=C</sub>;2a<sub>2</sub>)<sup>0</sup>(π<sup>\*</sup><sub>ring</sub>;4b<sub>1</sub>)<sup>0</sup>.

<sup>b</sup>Weight of the configuration

<sup>c</sup>Mülliken charge on the adsorbate.

<sup>d</sup>Excitation energy in eV.

<sup>e</sup>Oscillator strength.

**Table S7.** M06-HF excitation energies (A<sub>2</sub> and B<sub>1</sub> states) of [Ag<sub>3</sub>-Py]<sup>−</sup> cluster.

| State                             | Sym                           | Configuration <sup>a</sup>                                                          | w <sup>b</sup> | Q <sup>c</sup> | ΔE <sup>d</sup> | f <sup>e</sup> |
|-----------------------------------|-------------------------------|-------------------------------------------------------------------------------------|----------------|----------------|-----------------|----------------|
| S <sub>0</sub>                    | 1 <sup>1</sup> A <sub>1</sub> | Ref. Conf.                                                                          |                | 0.06           |                 |                |
| S <sub>1</sub> (CT <sub>0</sub> ) | 1 <sup>1</sup> B <sub>1</sub> | (5s <sub>n</sub> ) <sup>1</sup> (π <sup>*</sup> <sub>CNC</sub> ) <sup>1</sup>       | 0.42           | -0.78          | 1.47            | 0.0000         |
|                                   |                               | (5s <sub>+</sub> ) <sup>1</sup> (π <sup>*</sup> <sub>CNC</sub> ) <sup>1</sup>       | 0.07           |                |                 |                |
| S <sub>2</sub> (CT <sub>1</sub> ) | 1 <sup>1</sup> A <sub>2</sub> | (5s <sub>n</sub> ) <sup>1</sup> (π <sup>*</sup> <sub>C=C</sub> ) <sup>1</sup>       | 0.43           | -0.82          | 1.88            | 0.0000         |
|                                   |                               | (5s <sub>+</sub> ) <sup>1</sup> (π <sup>*</sup> <sub>C=C</sub> ) <sup>1</sup>       | 0.06           |                |                 |                |
| S <sub>4</sub>                    | 2 <sup>1</sup> B <sub>1</sub> | (5s <sub>n</sub> ) <sup>1</sup> (5p <sub>x+</sub> ) <sup>1</sup>                    | 0.42           | 0.07           | 2.07            | 0.0046         |
|                                   |                               | (5s <sub>n</sub> ) <sup>1</sup> (5p <sub>xn</sub> ) <sup>1</sup>                    | 0.04           |                |                 |                |
|                                   |                               | (5s <sub>n</sub> ) <sup>1</sup> (5p <sub>x</sub> + 5d <sub>xz</sub> ) <sup>1</sup>  | 0.04           |                |                 |                |
| S <sub>8</sub>                    | 3 <sup>1</sup> B <sub>1</sub> | (5s <sub>n</sub> ) <sup>1</sup> (5p <sub>xn</sub> ) <sup>1</sup>                    | 0.40           | 0.08           | 2.96            | 0.3900         |
|                                   |                               | (5s <sub>+</sub> ) <sup>1</sup> (5p <sub>x+</sub> ) <sup>1</sup>                    | 0.05           |                |                 |                |
|                                   |                               | (5s <sub>+</sub> ) <sup>1</sup> (5p <sub>x+</sub> ) <sup>1</sup>                    | 0.03           |                |                 |                |
|                                   |                               | (5s <sub>n</sub> ) <sup>1</sup> (5p <sub>x</sub> + 5d <sub>xz</sub> ) <sup>1</sup>  | 0.02           |                |                 |                |
| S <sub>10</sub>                   | 4 <sup>1</sup> B <sub>1</sub> | (5s <sub>+</sub> ) <sup>1</sup> (5p <sub>x+</sub> ) <sup>1</sup>                    | 0.34           | -0.09          | 3.50            | 0.0730         |
|                                   |                               | (5s <sub>+</sub> ) <sup>1</sup> (π <sup>*</sup> <sub>CNC</sub> ) <sup>1</sup>       | 0.08           |                |                 |                |
|                                   |                               | (5s <sub>n</sub> ) <sup>1</sup> (5p <sub>xn</sub> ) <sup>1</sup>                    | 0.02           |                |                 |                |
|                                   |                               | (5s <sub>+</sub> ) <sup>1</sup> (5p <sub>x</sub> + 5d <sub>xz</sub> ) <sup>1</sup>  | 0.02           |                |                 |                |
|                                   |                               | (5s <sub>n</sub> ) <sup>1</sup> (π <sup>*</sup> <sub>CNC</sub> ) <sup>1</sup>       | 0.01           |                |                 |                |
| S <sub>12</sub>                   | 5 <sup>1</sup> B <sub>1</sub> | (5s <sub>+</sub> ) <sup>1</sup> (π <sup>*</sup> <sub>CNC</sub> ) <sup>1</sup>       | 0.31           | -0.62          | 3.61            | 0.0557         |
| (CT <sub>0</sub> )                |                               | (5s <sub>+</sub> ) <sup>1</sup> (5p <sub>x+</sub> ) <sup>1</sup>                    | 0.10           |                |                 |                |
|                                   |                               | (5s <sub>n</sub> ) <sup>1</sup> (π <sup>*</sup> <sub>CNC</sub> ) <sup>1</sup>       | 0.06           |                |                 |                |
|                                   |                               | (5s <sub>+</sub> ) <sup>1</sup> (5p <sub>xn</sub> ) <sup>1</sup>                    | 0.01           |                |                 |                |
| S <sub>14</sub>                   | 6 <sup>1</sup> B <sub>1</sub> | (5s <sub>n</sub> ) <sup>1</sup> (5p <sub>x</sub> + 5d <sub>xz</sub> ) <sup>1</sup>  | 0.34           | 0.03           | 3.65            | 0.1803         |
|                                   |                               | (5s <sub>+</sub> ) <sup>1</sup> (5p <sub>xn</sub> ) <sup>1</sup>                    | 0.09           |                |                 |                |
|                                   |                               | (5s <sub>n</sub> ) <sup>1</sup> (5p <sub>xn</sub> ) <sup>1</sup>                    | 0.04           |                |                 |                |
|                                   |                               | (5s <sub>+</sub> ) <sup>1</sup> (π <sup>*</sup> <sub>CNC</sub> ) <sup>1</sup>       | 0.02           |                |                 |                |
|                                   |                               | (5s <sub>+</sub> ) <sup>1</sup> (5p <sub>x+</sub> ) <sup>1</sup>                    | 0.01           |                |                 |                |
| S <sub>15</sub>                   | 2 <sup>1</sup> A <sub>2</sub> | (5s <sub>+</sub> ) <sup>1</sup> (π <sup>*</sup> <sub>C=C</sub> ) <sup>1</sup>       | 0.43           | -0.86          | 3.88            | 0,0000         |
| (CT <sub>1</sub> )                |                               | (5s <sub>n</sub> ) <sup>1</sup> (π <sup>*</sup> <sub>C=C</sub> ) <sup>1</sup>       | 0.06           |                |                 |                |
| S <sub>19</sub>                   | 7 <sup>1</sup> B <sub>1</sub> | (5s <sub>+</sub> ) <sup>1</sup> (5p <sub>xn</sub> ) <sup>1</sup>                    | 0.38           | 0.08           | 4.25            | 0.0074         |
|                                   |                               | (5s <sub>n</sub> ) <sup>1</sup> (5p <sub>x</sub> + 5d <sub>xz</sub> ) <sup>1</sup>  | 0.08           |                |                 |                |
|                                   |                               | (5s <sub>n</sub> ) <sup>1</sup> (5p <sub>x+</sub> ) <sup>1</sup>                    | 0.02           |                |                 |                |
| S <sub>20</sub>                   | 8 <sup>1</sup> B <sub>1</sub> | (n+d <sub>z2(-)</sub> ) <sup>1</sup> (π <sup>*</sup> <sub>CNC</sub> ) <sup>1</sup>  | 0.15           | -0.08          | 4.61            | 0.0035         |
|                                   |                               | (n+d <sub>z2(+)</sub> ) <sup>1</sup> (π <sup>*</sup> <sub>CNC</sub> ) <sup>1</sup>  | 0.10           |                |                 |                |
|                                   |                               | (n-d <sub>z2(n)</sub> ) <sup>1</sup> (π <sup>*</sup> <sub>CNC</sub> ) <sup>1</sup>  | 0.09           |                |                 |                |
|                                   |                               | (n-d <sub>z2(+)</sub> ) <sup>1</sup> (π <sup>*</sup> <sub>CNC</sub> ) <sup>1</sup>  | 0.07           |                |                 |                |
|                                   |                               | (5s <sub>+</sub> ) <sup>1</sup> (π <sup>*</sup> <sub>CNC</sub> ) <sup>1</sup>       | 0.01           |                |                 |                |
|                                   |                               | (n+d <sub>z2(-)</sub> ) <sup>1</sup> (π <sup>*</sup> <sub>ring</sub> ) <sup>1</sup> | 0.01           |                |                 |                |
| S <sub>23</sub>                   | 9 <sup>1</sup> B <sub>1</sub> | (5s <sub>+</sub> ) <sup>1</sup> (5p <sub>x</sub> + 5d <sub>xz</sub> ) <sup>1</sup>  | 0.46           | 0.07           | 5.01            | 0.0250         |
|                                   |                               | (5s <sub>+</sub> ) <sup>1</sup> (5p <sub>x+</sub> ) <sup>1</sup>                    | 0.01           |                |                 |                |

<sup>a</sup>Reference configuration:  
(n;a<sub>1</sub>)<sup>2</sup>(5s<sub>+</sub>;a<sub>1</sub>)<sup>2</sup>(5s<sub>n</sub>;a<sub>1</sub>)<sup>2</sup>(π<sub>ring</sub>;1b<sub>1</sub>)<sup>2</sup>(π<sub>CNC</sub>;2b<sub>1</sub>)<sup>2</sup>(π<sub>C=C</sub>;1a<sub>2</sub>)<sup>2</sup>(5s.)<sup>0</sup>(π<sup>\*</sup><sub>CNC</sub>;3b<sub>1</sub>)<sup>0</sup>(π<sup>\*</sup><sub>C=C</sub>;2a<sub>2</sub>)<sup>0</sup>(π<sup>\*</sup><sub>ring</sub>;4b<sub>1</sub>)<sup>0</sup>.  
<sup>b</sup>Weight of the configuration  
<sup>c</sup>Mülliken charge on the adsorbate.  
<sup>d</sup>Excitation energy in eV.  
<sup>e</sup>Oscillator strength.

**Table S8.** M06-HF excitation energies ( $A_2$  and  $B_1$  states) of  $[Ag_n\text{-Py}]^q$  clusters.

| Cluster  | State                                 | Configuration                         | $w^a$ | $Q^b$ | $\Delta E^c$ | $f^d$  |
|----------|---------------------------------------|---------------------------------------|-------|-------|--------------|--------|
| $Ag_3^-$ | GS ( $S_0$ ) $1^1A_1$                 | Ref. Conf.                            |       | 0.06  |              |        |
|          | CT <sub>0</sub> ( $S_1$ ) $1^1B_1$    | $(5s_n)^1(\pi^*_{CNC})^1$             | 0.42  | -0.78 | 1.47         | 0.0000 |
|          |                                       | $(5s_+)^1(\pi^*_{CNC})^1$             | 0.07  |       |              |        |
|          | CT <sub>1</sub> ( $S_2$ ) $1^1A_2$    | $(5s_n)^1(\pi^*_{C=C})^1$             | 0.43  | -0.82 | 1.88         | 0.0000 |
|          |                                       | $(5s_+)^1(\pi^*_{C=C})^1$             | 0.06  |       |              |        |
| $Ag_5^-$ | $S_1$ ( $S_{20}$ ) $8^1B_1$           | $(n+d_{z2(-)})^1(\pi^*_{CNC})^1$      | 0.15  | -0.08 | 4.61         | 0.0035 |
|          |                                       | $(n+d_{z2(+)})^1(\pi^*_{CNC})^1$      | 0.10  |       |              |        |
|          | GS ( $S_0$ ) $1^1A_1$                 | Ref. Conf.                            |       | 0.07  |              |        |
|          | CT <sub>0</sub> ( $S_2$ ) $1^1B_1$    | $(5s_n)^1(\pi^*_{CNC})^1$             | 0.34  | -0.73 | 2.00         | 0.0004 |
|          |                                       | $(5s_+)^1(\pi^*_{CNC})^1$             | 0.11  |       |              |        |
| $Ag_7^-$ | CT <sub>1</sub> ( $S_3$ ) $1^1A_2$    | $(5s_n)^1(\pi^*_{C=C})^1$             | 0.37  | -0.79 | 2.45         | 0.0000 |
|          |                                       | $(5s_+)^1(\pi^*_{C=C})^1$             | 0.10  |       |              |        |
|          | $S_1$ ( $S_{31}$ ) $12^1B_1$          | $(n)^1(\pi^*_{CNC})^1$                | 0.15  | -0.19 | 4.82         | 0.0005 |
|          | GS ( $S_0$ ) $1^1A_1$                 | Ref. Conf.                            |       | 0.09  |              |        |
|          | CT <sub>0</sub> ( $S_2$ ) $1^1B_1$    | $(5s_n)^1(\pi^*_{CNC})^1$             | 0.27  | -0.68 | 2.37         | 0.0013 |
| $Ag_2^0$ |                                       | $(5s_{++})^1(\pi^*_{CNC})^1$          | 0.13  |       |              |        |
|          | CT <sub>1</sub> ( $S_9$ ) $1^1A_2$    | $(5s_n)^1(\pi^*_{C=C})^1$             | 0.3   | -0.77 | 2.85         | 0.0000 |
|          |                                       | $(5s_{++})^1(\pi^*_{C=C})^1$          | 0.13  |       |              |        |
|          | $S_1$ ( $S_{44}$ ) $16^1B_1$          | $(n)^1(\pi^*_{CNC})^1$                | 0.21  | -0.09 | 4.94         | 0.0051 |
|          | GS ( $S_0$ ) $1^1A_1$                 | Ref. Conf.                            |       | 0.12  |              |        |
| $Ag_7^+$ | CT <sub>0</sub> ( $S_3$ ) $1^1B_1$    | $(5s_+)^1(\pi^*_{CNC})^1$             | 0.40  | -0.34 | 3.30         | 0.1073 |
|          |                                       | $(5s_+)^1(5p_+)^1$                    | 0.07  |       |              |        |
|          | CT <sub>1</sub> ( $S_5$ ) $1^1A_2$    | $(5s_+)^1(\pi^*_{C=C})^1$             | 0.5   | -0.72 | 3.95         | 0.0000 |
|          | $S_1$ ( $S_{10}$ ) $4^1B_1$           | $(n + d_{z(-)})^1(\pi^*_{CNC})^1$     | 0.27  | -0.04 | 5.14         | 0.0037 |
|          | GS ( $S_0$ ) $1^1A_1$                 | Ref. Conf.                            |       | 0.18  |              |        |
| $Ag_5^+$ | CT <sub>0</sub> ( $S_{21}$ ) $7^1B_1$ | $(5s_{++})^1(\pi^*_{CNC})^1$          | 0.16  | -0.24 | 4.86         | 0.0150 |
|          | CT <sub>1</sub> ( $S_{27}$ ) $1^1A_2$ | $(5s_{++})^1(\pi^*_{C=C})^1$          | 0.34  | -0.64 | 5.51         | 0.0000 |
|          |                                       | $(5s_+)^1(\pi^*_{C=C})^1$             | 0.13  |       |              |        |
|          | $S_1$ ( $S_{33}$ ) $11^1B_1$          | $(n)^1(\pi^*_{CNC})^1$                | 0.23  | 0.00  | 5.62         | 0.0027 |
|          | GS ( $S_0$ ) $1^1A_1$                 | Ref. Conf.                            |       | 0.19  |              |        |
| $Ag_3^+$ | CT <sub>0</sub> ( $S_{14}$ )          | $(5s_{++})^1(\pi^*_{CNC})^1$          | 0.29  | -0.34 | 5.08         | 0.0072 |
|          |                                       | $(5s_{++})^1(\pi^*_{CNC})^1$          | 0.08  |       |              |        |
|          |                                       | $(n)^1(\pi^*_{CNC})^1$                | 0.06  |       |              |        |
|          | CT <sub>1</sub> ( $S_{22}$ )          | $(5s_+)^1(\pi^*_{C=C})^1$             | 0.41  | -0.62 | 5.80         | 0.0000 |
|          |                                       | $(5s_{++})^1(\pi^*_{C=C})^1$          | 0.08  |       |              |        |
| $Ag_5^-$ | $S_1$ ( $S_{19}$ )                    | $(n)^1(\pi^*_{CNC})^1$                | 0.25  | -0.04 | 0.00         | 0.0013 |
|          |                                       | $(5s_{++})^1(\pi^*_{C=C})^1$          | 0.08  |       |              |        |
|          | GS ( $S_0$ ) $1^1A_1$                 | Ref. Conf.                            |       | 0.21  |              |        |
|          | CT <sub>0</sub> ( $S_{11}$ ) $4^1B_1$ | $(5s_+)^1(\pi^*_{CNC} + 5p_{x(n)})^1$ | 0.15  | -0.1  | 5.93         | 0.0037 |
|          |                                       | $(d_{xz(-)})^1(5s_n)^1$               | 0.12  |       |              |        |
| $Ag_3^-$ | CT <sub>1</sub> ( $S_{20}$ ) $3^1A_2$ | $(5s_+)^1(\pi^*_{C=C})^1$             | 0.47  | -0.55 | 6.38         | 0.0000 |
|          |                                       | $(n)^1(\pi^*_{C=C})^1$                | 0.03  |       |              |        |
|          | $S_1$ ( $S_8$ ) $3^1B_1$              | $(n)^1(\pi^*_{CNC} + 5p_{x(n)})^1$    | 0.18  | -0.04 | 5.46         | 0.0069 |
|          |                                       | $(5s_+)^1(5p_{x(n)} + \pi^*_{CNC})^1$ | 0.10  |       |              |        |

<sup>a</sup>Weight of the configuration.<sup>b</sup>Mülliken charge on the adsorbate.<sup>c</sup>Excitation energy in eV.<sup>d</sup>Oscillator strength.
